# Supplementary material for: Diverse distribution of tyrosine receptor kinase B isoforms in rat multiple tissues
Source: PubMed Central journal article supplement — J Vet Med Sci. 2017 Jul 29;79(9):1516–23. doi: 10.1292/jvms.17-0257 (PMC5627321; doi:10.1292/jvms.17-0257), 2017-07-29
Supplement: jvms-79-1516-s001.pdf [file jvms-79-1516-s001.pdf]

## Supplemental table

| Gene<br>(accession no.)       | Primer (5'-)          |                      | bp  |
|-------------------------------|-----------------------|----------------------|-----|
|                               | Forward               | Reverse              |     |
| TrkB FL<br>(NM_012731.2)      | CGGACACATTTGTTTCAGCAC | AAGTCCTTGCGAGCATTGTC | 178 |
| TrkB T1<br>(NM_001163168.2)   | GAGCATCTCTCGGTCTATGC  | CCCATCCAGGGGGATCTTAT | 147 |
| TrkB T2<br>(NM_55293.1)       | TTGGCATGAAAGGTAAGCAG  | AGTGGGCAAGGCTGAGTAAT | 204 |
| 18s ribosome<br>(NR_046239.1) | TGAGGCCATGATTAAGAGGG  | AGTCGGCATCGTTTATGGTC | 190 |
| GAPDH<br>(NM_017008.4)        | GAGAATGGGAAGCTGGTCAT  | GAAGACGCCAGTAGACTCCA | 120 |

List of gene specific primers used for RT-PCR. bp: predicted base pairs of amplification products, TrkB FL: full length tyrosine receptor kinase B (TrkB), TrkB T1: truncated TrkB type 1, TrkB T2: truncated TrkB type 2, GAPDH: glyceraldehyde-3-phosphate dehydrogenase

## Supplemental figure 1

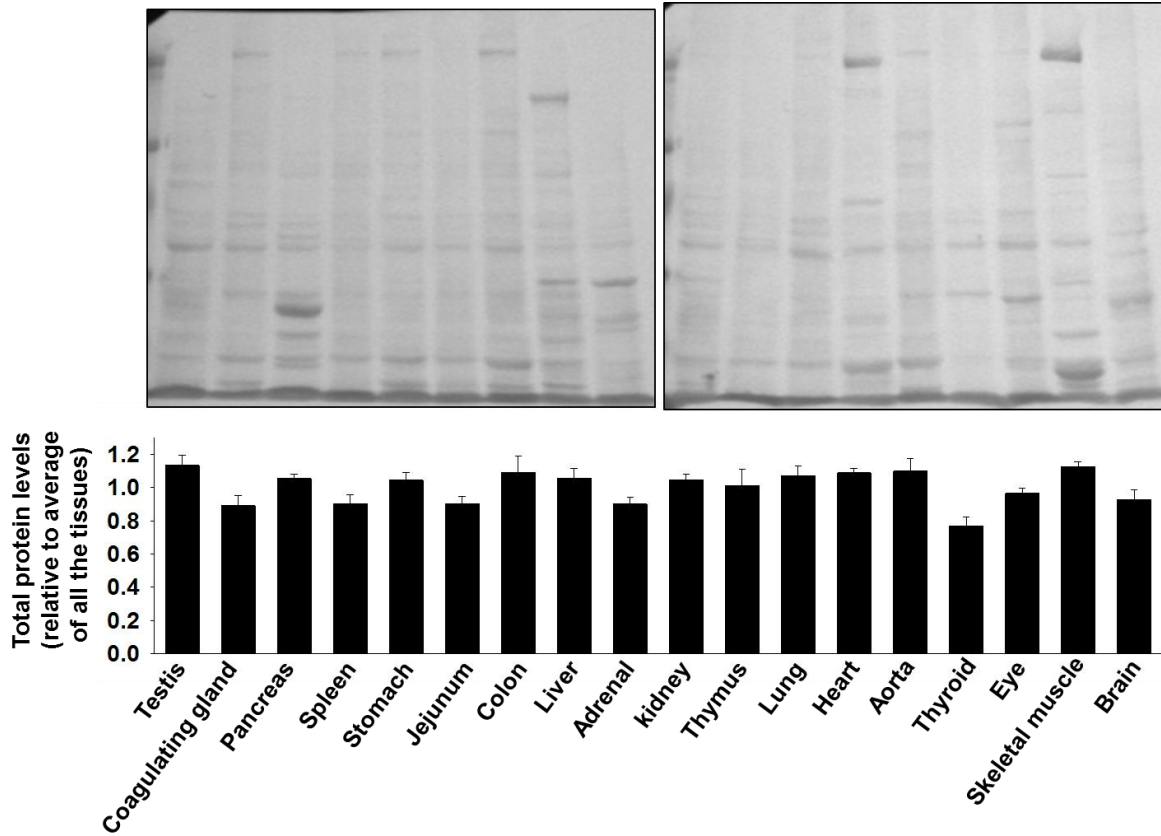

Equal loading of protein was confirmed by Ponceau-S staining. Total protein was extracted from homogenized tissues of Wistar rats and Western blotting was performed. The membranes were stained with Ponceau-S before they were blocked with 0.5% skim milk. The density of all the visible bands in each lane was measured as expression level of total protein (n = 3-4). Bar graph represents the data normalized to averaged density of all the tissues. Data were expressed as mean  $\pm$  SE.

## Supplemental figure 2

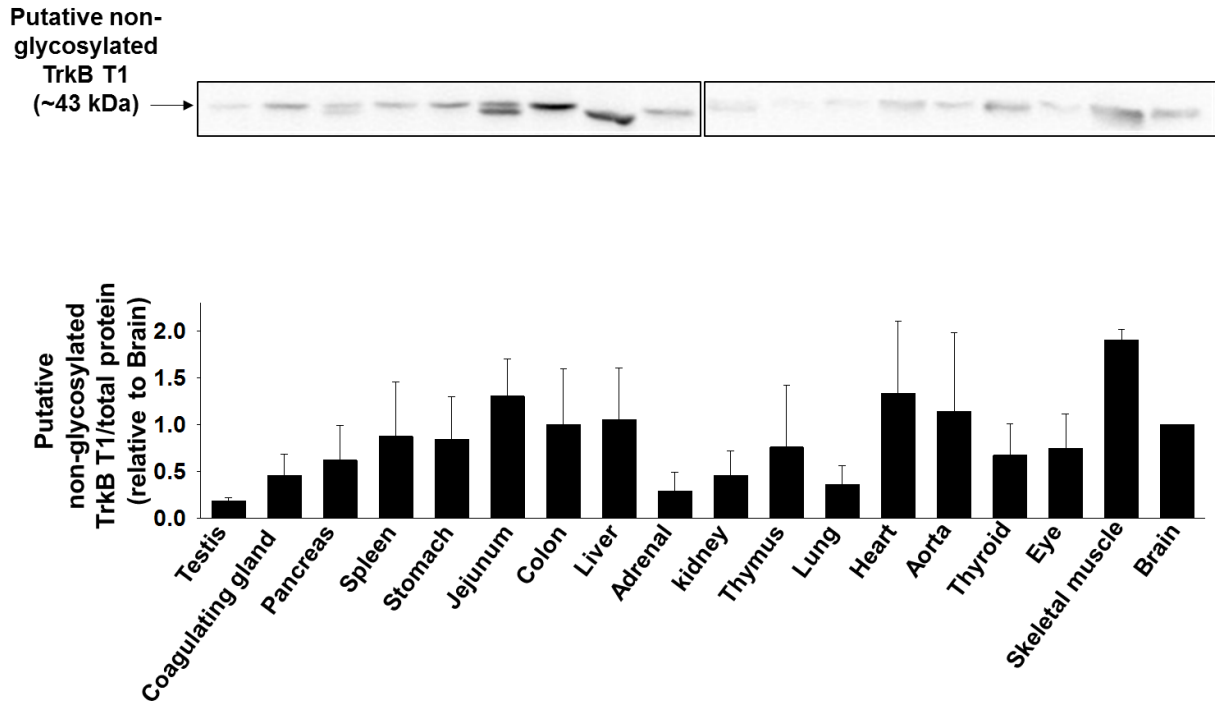

Expression level of putative non-glycosylated Truncated tyrosine receptor kinase B type-1 (TrkB T1) protein in rat tissues. Total protein was extracted from homogenized tissues of Wistar rats. Expression of putative non-glycosylated TrkB T1 protein was determined by Western blotting (n = 3-4) using anti-TrkB T1 antibody (sc-119, Santa Cruz Biotech). Equal loading of protein was confirmed by Ponceau-S staining. The data normalized to total protein were shown relative to brain in bar graph. Data were expressed as mean  $\pm$  SE.
